# Supplementary material for: LiFePO4-coated LiNi0.6Co0.2Mn0.2O2 for lithium-ion batteries with enhanced cycling performance at elevated temperatures and high voltages
Source: Royal Society of Chemistry journal article supplement (doi:10.1039/d0ra07764j), 2020-01-01
Supplement: d0ra07764j1.pdf [file d0ra07764j1.pdf]

## Supporting information

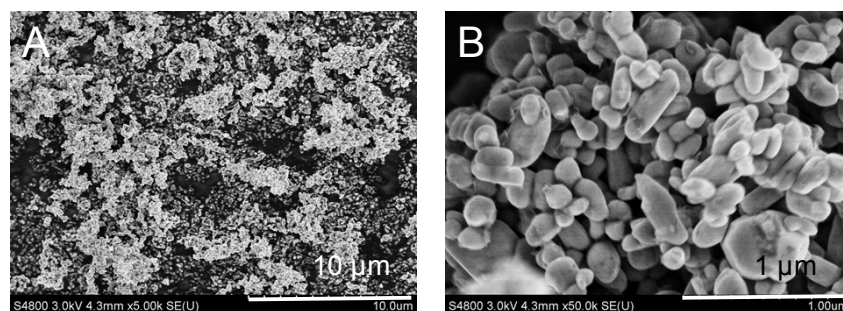

Fig. S1† SEM images of LFP

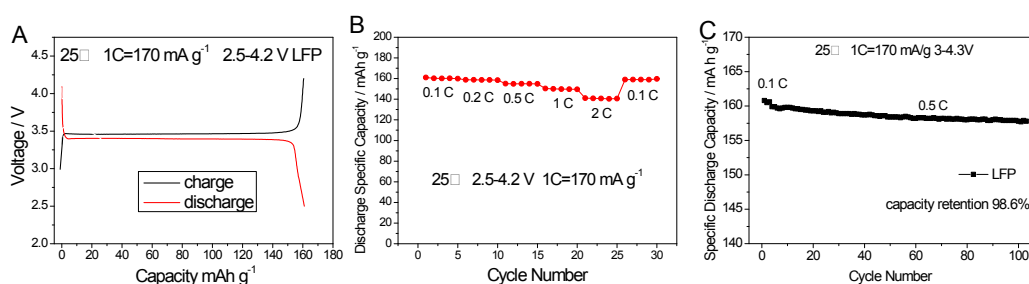

Fig. S2† (A) Initial charge and discharge curves of the LFP at 0.2 C at 25°C (B) Rate performance of LFP at 55°C (C) Cycling performance of LFP at 25°C

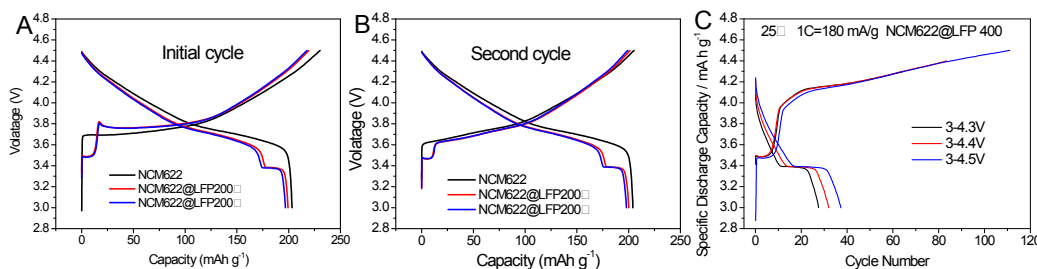

Fig. S3† (A) Initial and (B) second cycle charge and discharge curves of the sample with pristine NCM622, NCM@LFP 100, NCM@LFP 200 at 25°C at a current rate of 0.2C in the voltage range of 3.0-4.3 V, (C) Initial charge and discharge curves of NCM@LFP 400 at 25°C at a current rate of 0.1C in the voltage range of 3.0-4.3 V, 3.0-4.5 V, 3.0-4.5 V

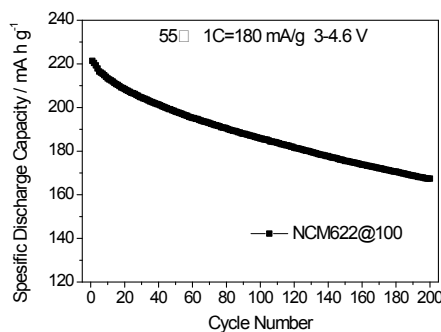

Fig. S4† Cycling performance of NCM622@LFP 100 at 1C in the voltage range of 3-4.6V at 55°C

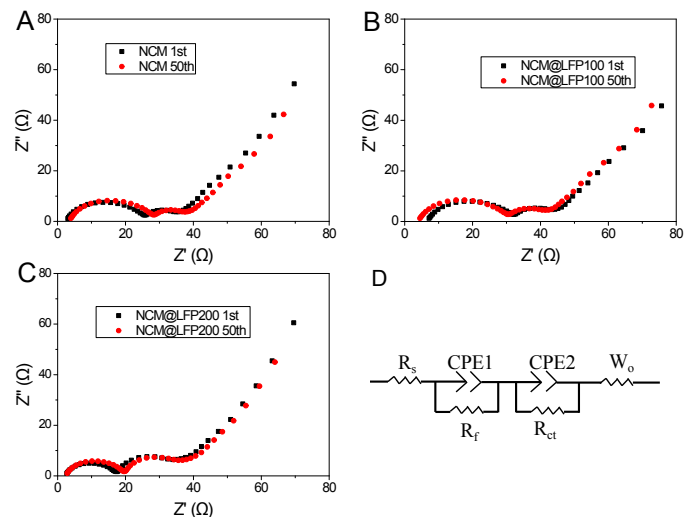

Fig. S5† Nyquist plots of the pristine (A) NCM622 (B) NCM@LFP 100 and (C) NCM@LFP 200 charged at 4.5 V at initial charge cycle and 50<sup>th</sup> charge cycle, (D) the equivalent circuit model.

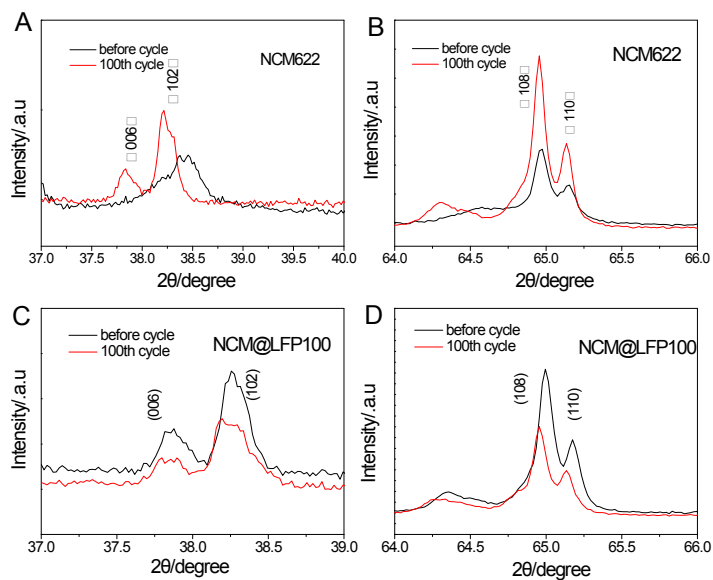

Fig. S6† XRD patterns of different cathodes after 1 and 100 charging-discharging cycles: (A) bare NCM622, (B) NCM@LFP 100

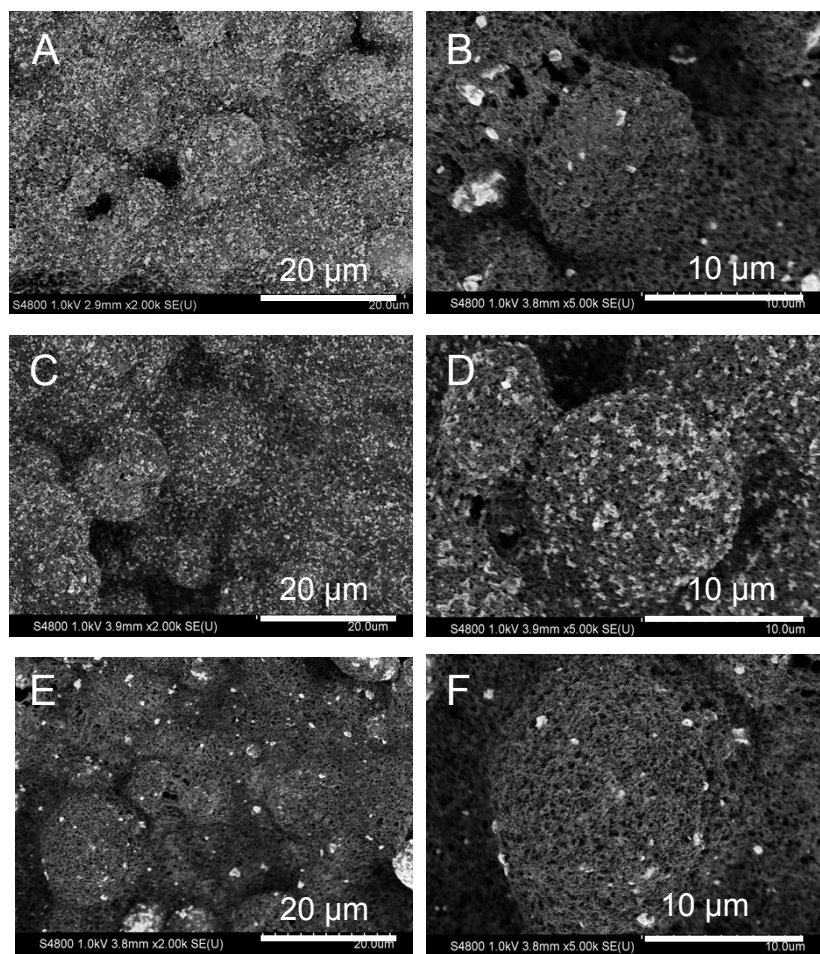

Fig. S7† SEM images of cathodes before charging-discharging process: (A) (B) pristine NCM622, (C) (D) NCM622@LFP 100, (E) (F) NCM622@LFP 200
